# Supplementary material for: The Influence of Storage Temperature and Packaging Technology on the Durability of Ready-to-Eat Preservative-Free Meat Bars with Dried Plasma
Source: MDPI journal article supplement (doi:10.3390/foods12234372), 2023-12-04
Supplement: s1 [file s1]

**Table S1.** Mean log counts (with standard deviation) of APC, LAB, *S. aureus*, yeast and mould in VP\_C and MAP\_C RTE meat bars

| Microorganisms tested | Storage time [= measurement days] | Packaging methods and storage temperatures |                          |                          |                          |                          |
|-----------------------|-----------------------------------|--------------------------------------------|--------------------------|--------------------------|--------------------------|--------------------------|
|                       |                                   | MAP                                        |                          | VP                       |                          |                          |
|                       |                                   | 4°C                                        | 8°C                      | 4°C                      | 6°C                      | 8°C                      |
| APC                   | 0                                 | 4.43 <sup>aA</sup> ±0.14                   | 4.43 <sup>aA</sup> ±0.14 | 5.12 <sup>aB</sup> ±0.16 | 5.12 <sup>aB</sup> ±0.16 | 5.12 <sup>aB</sup> ±0.16 |
|                       | 1                                 | 3.79 <sup>aA</sup> ±0.59                   | 4.12 <sup>aA</sup> ±0.48 | n/p                      | n/p                      | n/p                      |
|                       | 3                                 | 3.68 <sup>aA</sup> ±0.65                   | 3.73 <sup>aA</sup> ±0.57 | 5.23 <sup>aB</sup> ±0.18 | 5.14 <sup>aB</sup> ±0.19 | 5.39 <sup>aB</sup> ±0.21 |
|                       | 7                                 | 4.40 <sup>aA</sup> ±0.10                   | 4.39 <sup>aA</sup> ±0.40 | 5.00 <sup>aB</sup> ±0.07 | 4.85 <sup>aB</sup> ±0.10 | 5.04 <sup>aB</sup> ±0.25 |
|                       | 10                                | 4.17 <sup>aA</sup> ±0.42                   | 4.31 <sup>aA</sup> ±0.76 | n/p                      | n/p                      | n/p                      |
|                       | 12                                | n/p                                        | n/p                      | 5.21 <sup>aA</sup> ±0.49 | 5.29 <sup>aA</sup> ±0.43 | 5.39 <sup>aA</sup> ±0.14 |
|                       | 14                                | 4.14 <sup>aA</sup> ±0.21                   | 4.16 <sup>aA</sup> ±0.26 | 4.97 <sup>aB</sup> ±0.01 | 5.44 <sup>aB</sup> ±0.73 | 5.97 <sup>aC</sup> ±0.16 |
|                       | 16                                | n/p                                        | n/p                      | 5.36 <sup>aA</sup> ±0.16 | 5.03 <sup>aA</sup> ±0.21 | 5.16 <sup>aA</sup> ±0.28 |
|                       | 17                                | 4.48 <sup>aA</sup> ±0.19                   | 5.21 <sup>bB</sup> ±0.44 | n/p                      | n/p                      | n/p                      |
|                       | 21                                | 4.35 <sup>aA</sup> ±0.21                   | 4.33 <sup>aA</sup> ±0.27 | 5.30 <sup>aB</sup> ±0.13 | 5.24 <sup>aB</sup> ±0.02 | 5.00 <sup>aB</sup> ±0.06 |
|                       | 24                                | 5.14 <sup>bA</sup> ±0.17                   | 5.02 <sup>bA</sup> ±0.24 | n/p                      | n/p                      | n/p                      |
|                       | 28                                | 4.01 <sup>aA</sup> ±0.33                   | 4.41 <sup>aA</sup> ±0.38 | n/p                      | n/p                      | n/p                      |
|                       | 35                                | 3.95 <sup>aA</sup> ±0.31                   | 4.60 <sup>aB</sup> ±0.54 | n/p                      | n/p                      | n/p                      |
| LAB                   | 0                                 | 2.02 <sup>aA</sup> ±0.11                   | 2.02 <sup>aA</sup> ±0.11 | 3.76 <sup>aB</sup> ±1.60 | 3.76 <sup>aB</sup> ±1.60 | 3.76 <sup>aB</sup> ±1.60 |
|                       | 1                                 | 2.02 <sup>aA</sup> ±0.47                   | 1.86 <sup>aA</sup> ±0.43 | n/p                      | n/p                      | n/p                      |
|                       | 3                                 | 2.02 <sup>aA</sup> ±0.23                   | 2.06 <sup>aA</sup> ±0.55 | 1.05 <sup>bB</sup> ±0.07 | 1.35 <sup>bB</sup> ±0.49 | 1.25 <sup>bB</sup> ±0.36 |
|                       | 7                                 | 0.78 <sup>bA</sup> ±0.25                   | 0.67 <sup>bA</sup> ±0.47 | 1.55 <sup>bB</sup> ±0.41 | 1.52 <sup>bB</sup> ±0.43 | 2.15 <sup>cC</sup> ±0.81 |
|                       | 10                                | 2.39 <sup>aA</sup> ±0.32                   | 2.47 <sup>aA</sup> ±1.08 | n/p                      | n/p                      | n/p                      |
|                       | 12                                | n/p                                        | n/p                      | 2.92 <sup>cA</sup> ±1.05 | 3.07 <sup>aA</sup> ±1.54 | 3.83 <sup>aB</sup> ±0.66 |
|                       | 14                                | 1.37 <sup>bA</sup> ±0.79                   | 1.50 <sup>cA</sup> ±0.41 | 2.19 <sup>cB</sup> ±1.68 | 2.14 <sup>cB</sup> ±0.53 | 2.23 <sup>cB</sup> ±1.74 |
|                       | 16                                | n/p                                        | n/p                      | 2.73 <sup>cA</sup> ±0.67 | 2.06 <sup>cB</sup> ±0.96 | 2.45 <sup>cA</sup> ±1.12 |
|                       | 17                                | 2.75 <sup>cA</sup> ±0.04                   | 3.08 <sup>dA</sup> ±0.43 | n/p                      | n/p                      | n/p                      |
|                       | 21                                | 1.33 <sup>bA</sup> ±0.47                   | 2.79 <sup>dB</sup> ±0.53 | 1.25 <sup>bA</sup> ±0.36 | 1.32 <sup>bA</sup> ±0.00 | 1.33 <sup>bA</sup> ±0.46 |
|                       | 24                                | 2.38 <sup>aA</sup> ±0.32                   | 3.80 <sup>eB</sup> ±0.17 | n/p                      | n/p                      | n/p                      |
|                       | 28                                | 1.95 <sup>aA</sup> ±0.49                   | 3.66 <sup>eB</sup> ±0.36 | n/p                      | n/p                      | n/p                      |
|                       | 35                                | 2.23 <sup>aA</sup> ±0.69                   | 3.94 <sup>eB</sup> ±0.35 | n/p                      | n/p                      | n/p                      |
| <i>S. aureus</i>      | 0                                 | 2.44 <sup>aA</sup> ±0.39                   | 2.44 <sup>aA</sup> ±0.39 | 1.12 <sup>aB</sup> ±0.79 | 1.12 <sup>aB</sup> ±0.79 | 1.12 <sup>aB</sup> ±0.79 |
|                       | 1                                 | 1.61 <sup>bA</sup> ±0.48                   | 1.48 <sup>bA</sup> ±0.35 | n/p                      | n/p                      | n/p                      |
|                       | 3                                 | 1.02 <sup>cA</sup> ±0.17                   | 1.13 <sup>bA</sup> ±0.11 | 1.58 <sup>aA</sup> ±0.42 | 1.33 <sup>aA</sup> ±0.46 | 1.39 <sup>aA</sup> ±0.35 |
|                       | 7                                 | 2.06 <sup>aA</sup> ±0.25                   | 2.11 <sup>aA</sup> ±0.26 | 1.00 <sup>aB</sup> ±0.00 | 1.62 <sup>aA</sup> ±0.67 | 1.11 <sup>aB</sup> ±0.15 |
|                       | 10                                | 0.77 <sup>cA</sup> ±0.06                   | 0.72 <sup>cA</sup> ±0.18 | n/p                      | n/p                      | n/p                      |
|                       | 12                                | n/p                                        | n/p                      | 1.95 <sup>bA</sup> ±0.67 | 1.78 <sup>bA</sup> ±0.55 | 1.97 <sup>bA</sup> ±0.74 |
|                       | 14                                | 1.55 <sup>bA</sup> ±0.17                   | 2.65 <sup>aB</sup> ±0.08 | 1.32 <sup>aA</sup> ±0.45 | 2.20 <sup>bB</sup> ±0.48 | 1.48 <sup>aA</sup> ±0.34 |
|                       | 16                                | n/p                                        | n/p                      | 1.01 <sup>aA</sup> ±0.83 | 1.32 <sup>aA</sup> ±0.26 | 1.11 <sup>aA</sup> ±0.15 |
|                       | 17                                | 1.28 <sup>cA</sup> ±0.28                   | 1.36 <sup>bA</sup> ±0.22 | n/p                      | n/p                      | n/p                      |
|                       | 21                                | 2.38 <sup>aA</sup> ±0.04                   | 2.37 <sup>aA</sup> ±0.13 | 2.00 <sup>bA</sup> ±0.48 | 2.16 <sup>bA</sup> ±0.61 | 2.16 <sup>bA</sup> ±0.59 |
|                       | 24                                | 1.84 <sup>bA</sup> ±0.37                   | 1.65 <sup>bA</sup> ±0.32 | n/p                      | n/p                      | n/p                      |
|                       | 28                                | 1.79 <sup>bA</sup> ±0.56                   | 1.25 <sup>bB</sup> ±0.23 | n/p                      | n/p                      | n/p                      |
|                       | 35                                | 1.73 <sup>bA</sup> ±0.09                   | 1.76 <sup>bA</sup> ±0.07 | n/p                      | n/p                      | n/p                      |

|                 |    |                          |                          |                          |                          |                          |
|-----------------|----|--------------------------|--------------------------|--------------------------|--------------------------|--------------------------|
| Yeast and mould | 0  | 0.00 <sup>aA</sup> ±0.00 | 0.00 <sup>aA</sup> ±0.00 | 0.33 <sup>cB</sup> ±0.47 | 0.33 <sup>bB</sup> ±0.47 | 0.33 <sup>bB</sup> ±0.47 |
|                 | 1  | 0.00 <sup>aA</sup> ±0.00 | 0.00 <sup>aA</sup> ±0.00 | n/p                      | n/p                      | n/p                      |
|                 | 3  | 0.77 <sup>bA</sup> ±1.09 | 0.00 <sup>aB</sup> ±0.00 | 0.00 <sup>aB</sup> ±0.00 | 0.00 <sup>aB</sup> ±0.00 | 0.00 <sup>aB</sup> ±0.00 |
|                 | 7  | 0.00 <sup>aA</sup> ±0.00 |
|                 | 10 | 0.00 <sup>aA</sup> ±0.00 | 0.00 <sup>aA</sup> ±0.00 | n/p                      | n/p                      | n/p                      |
|                 | 12 | n/p                      | n/p                      | 1.16 <sup>bA</sup> ±1.65 | 0.33 <sup>bB</sup> ±0.47 | 0.33 <sup>bB</sup> ±0.47 |
|                 | 14 | 0.00 <sup>aA</sup> ±0.00 | 0.55 <sup>bB</sup> ±0.77 | 0.62 <sup>cB</sup> ±0.87 | 0.00 <sup>aA</sup> ±0.00 | 1.52 <sup>cC</sup> ±2.15 |
|                 | 16 | n/p                      | n/p                      | 0.00 <sup>aA</sup> ±0.00 | 0.00 <sup>aA</sup> ±0.00 | 0.00 <sup>aA</sup> ±0.00 |
|                 | 17 | 0.83 <sup>bA</sup> ±1.17 | 0.90 <sup>bA</sup> ±1.27 | n/p                      | n/p                      | n/p                      |
|                 | 21 | 0.00 <sup>aA</sup> ±0.00 |
|                 | 24 | 0.90 <sup>bA</sup> ±1.27 | 0.90 <sup>bA</sup> ±1.27 | n/p                      | n/p                      | n/p                      |
|                 | 28 | 0.00 <sup>aA</sup> ±0.00 | 1.91 <sup>cB</sup> ±0.40 | n/p                      | n/p                      | n/p                      |
|                 | 35 | 0.77 <sup>bA</sup> ±0.56 | 0.00 <sup>aB</sup> ±0.00 | n/p                      | n/p                      | n/p                      |

n/p – test was not performed on this measurement day  
A, B, C – means in the same row marked with the same letters are not statistically different at  $\alpha = 0.05$   
a, b, c, d, e - means in the same column marked with the same letters are not statistically different at  $\alpha = 0.05$   
 $p < 0.01$

**Table S2.** Mean log counts (with standard deviation) of APC, LAB, *S. aureus*, yeast and mould in VP\_NC and MAP\_NC RTE meat bars

| Microorg<br>anisms<br>tested | Storag<br>e time<br>[=<br>measu<br>remen<br>t day] | Packaging methods and storage temperature |                          |                          |                          |                          |                          |                          |                          |                          |                          |
|------------------------------|----------------------------------------------------|-------------------------------------------|--------------------------|--------------------------|--------------------------|--------------------------|--------------------------|--------------------------|--------------------------|--------------------------|--------------------------|
|                              |                                                    | MAP                                       |                          |                          |                          |                          |                          | VP                       |                          |                          |                          |
|                              |                                                    | 12 °C                                     | 16 °C                    | 20 °C                    | 24 °C                    | 30 °C                    | 34 °C                    | 12 °C                    | 16 °C                    | 20 °C                    | 24 °C                    |
| APC                          | 0                                                  | 4.43 <sup>aA</sup> ±0.14                  | 4.43 <sup>aA</sup> ±0.14 | 4.43 <sup>aA</sup> ±0.14 | 4.43 <sup>aA</sup> ±0.14 | 4.43 <sup>aA</sup> ±0.14 | 4.43 <sup>aA</sup> ±0.14 | 5.12 <sup>aB</sup> ±0.16 | 5.12 <sup>aB</sup> ±0.16 | 5.12 <sup>aB</sup> ±0.16 | 5.12 <sup>aB</sup> ±0.16 |
|                              | 1                                                  | 3.93 <sup>aA</sup> ±0.62                  | 4.09 <sup>aA</sup> ±0.32 | 4.50 <sup>aB</sup> ±0.15 | 4.99 <sup>bC</sup> ±0.26 | 5.99 <sup>bC</sup> ±0.34 | 5.28 <sup>bC</sup> ±0.55 | n/p                      | n/p                      | n/p                      | n/p                      |
|                              | 3                                                  | 4.47 <sup>aA</sup> ±0.22                  | 5.15 <sup>aB</sup> ±0.59 | 4.79 <sup>aB</sup> ±0.66 | 6.29 <sup>cA</sup> ±0.38 | 7.27 <sup>cD</sup> ±0.67 | 5.93 <sup>cA</sup> ±0.65 | 5.07 <sup>aB</sup> ±0.23 | 5.34 <sup>aB</sup> ±0.19 | 5.06 <sup>aB</sup> ±0.46 | 5.40 <sup>aB</sup> ±0.82 |
|                              | 7                                                  | 4.34 <sup>aA</sup> ±0.16                  | 5.01 <sup>aB</sup> ±0.88 | 5.60 <sup>bB</sup> ±0.88 | 6.94 <sup>dC</sup> ±0.18 | 7.07 <sup>cA</sup> ±0.54 | 7.26 <sup>dC</sup> ±0.50 | 5.48 <sup>aB</sup> ±0.41 | 5.49 <sup>aB</sup> ±0.69 | 5.42 <sup>aB</sup> ±0.87 | 5.84 <sup>aB</sup> ±0.98 |
|                              | 10                                                 | 4.57 <sup>aA</sup> ±0.19                  | 5.55 <sup>bB</sup> ±0.76 | 6.61 <sup>cC</sup> ±1.06 | 7.83 <sup>cD</sup> ±0.67 | 8.84 <sup>dE</sup> ±0.42 | 8.85 <sup>cE</sup> ±0.10 | n/p                      | n/p                      | n/p                      | n/p                      |
|                              | 12                                                 | n/p                                       | n/p                      | n/p                      | n/p                      | n/p                      | n/p                      | 5.11 <sup>aA</sup> ±0.30 | 5.29 <sup>aA</sup> ±0.38 | 5.62 <sup>aB</sup> ±0.65 | 5.78 <sup>aB</sup> ±0.64 |
|                              | 14                                                 | 4.77 <sup>aA</sup> ±0.67                  | 5.20 <sup>bA</sup> ±1.06 | 6.83 <sup>cB</sup> ±0.71 | 8.02 <sup>cC</sup> ±0.29 | 8.08 <sup>cC</sup> ±0.28 | 7.15 <sup>aB</sup> ±0.39 | 5.45 <sup>aD</sup> ±0.18 | 4.89 <sup>aA</sup> ±0.18 | 4.86 <sup>aA</sup> ±0.08 | 5.61 <sup>bD</sup> ±0.16 |
|                              | 16                                                 | n/p                                       | n/p                      | n/p                      | n/p                      | n/p                      | n/p                      | 5.58 <sup>aA</sup> ±0.70 | 5.50 <sup>aA</sup> ±0.76 | 5.46 <sup>aA</sup> ±0.66 | 5.15 <sup>aA</sup> ±0.98 |
|                              | 17                                                 | 6.40 <sup>bA</sup> ±0.42                  | 6.96 <sup>bB</sup> ±0.17 | 7.16 <sup>cC</sup> ±0.26 | 7.81 <sup>cD</sup> ±0.08 | 8.09 <sup>cD</sup> ±0.28 | 7.69 <sup>dD</sup> ±0.39 | n/p                      | n/p                      | n/p                      | n/p                      |
|                              | 21                                                 | 6.03 <sup>bA</sup> ±0.71                  | 6.55 <sup>bB</sup> ±0.57 | 7.43 <sup>cC</sup> ±0.28 | 8.29 <sup>cD</sup> ±0.30 | 8.57 <sup>dD</sup> ±0.36 | 6.59 <sup>aB</sup> ±0.27 | 5.04 <sup>aE</sup> ±0.06 | 5.06 <sup>aE</sup> ±0.16 | 5.09 <sup>aE</sup> ±0.15 | 4.93 <sup>aE</sup> ±0.06 |
|                              | 24                                                 | 5.96 <sup>bA</sup> ±0.45                  | 5.75 <sup>bA</sup> ±0.86 | 7.53 <sup>cB</sup> ±0.64 | 8.05 <sup>cA</sup> ±0.11 | 8.57 <sup>dC</sup> ±0.61 | 7.45 <sup>aB</sup> ±0.32 | n/p                      | n/p                      | n/p                      | n/p                      |
|                              | 28                                                 | 6.34 <sup>bA</sup> ±0.46                  | 6.80 <sup>bB</sup> ±0.19 | 7.65 <sup>cC</sup> ±0.06 | 8.01 <sup>cD</sup> ±0.27 | 8.22 <sup>cD</sup> ±0.59 | 6.40 <sup>cA</sup> ±0.43 | n/p                      | n/p                      | n/p                      | n/p                      |
|                              | 35                                                 | 6.38 <sup>bA</sup> ±0.51                  | 7.08 <sup>bB</sup> ±0.22 | 7.94 <sup>cC</sup> ±0.20 | 8.01 <sup>cA</sup> ±0.17 | 7.49 <sup>cD</sup> ±0.12 | 6.88 <sup>aB</sup> ±0.17 | n/p                      | n/p                      | n/p                      | n/p                      |
| LAB                          | 0                                                  | 2.02 <sup>aA</sup> ±0.11                  | 2.02 <sup>aA</sup> ±0.11 | 2.02 <sup>aA</sup> ±0.11 | 2.02 <sup>aA</sup> ±0.11 | 2.02 <sup>aA</sup> ±0.11 | 2.02 <sup>aA</sup> ±0.11 | 3.76 <sup>aA</sup> ±1.60 | 3.76 <sup>aA</sup> ±1.60 | 3.76 <sup>aA</sup> ±1.60 | 3.76 <sup>aA</sup> ±1.60 |
|                              | 1                                                  | 1.86 <sup>aA</sup> ±0.68                  | 2.04 <sup>aA</sup> ±0.50 | 3.76 <sup>bB</sup> ±0.46 | 3.57 <sup>bB</sup> ±0.30 | 4.99 <sup>bC</sup> ±0.51 | 4.94 <sup>bC</sup> ±0.67 | n/p                      | n/p                      | n/p                      | n/p                      |
|                              | 3                                                  | 2.37 <sup>aA</sup> ±0.62                  | 4.21 <sup>bB</sup> ±0.35 | 4.21 <sup>bB</sup> ±0.54 | 4.92 <sup>cA</sup> ±0.17 | 6.06 <sup>cD</sup> ±0.11 | 5.75 <sup>cD</sup> ±0.72 | 1.73 <sup>bA</sup> ±1.04 | 1.69 <sup>bA</sup> ±0.98 | 1.33 <sup>bA</sup> ±0.47 | 1.56 <sup>bA</sup> ±0.79 |
|                              | 7                                                  | 3.45 <sup>bA</sup> ±0.67                  | 4.07 <sup>bA</sup> ±0.64 | 4.76 <sup>bB</sup> ±0.31 | 5.29 <sup>bB</sup> ±0.57 | 6.53 <sup>cC</sup> ±0.55 | 7.98 <sup>dD</sup> ±0.09 | 2.8 <sup>cA</sup> ±1.43  | 2.41 <sup>cA</sup> ±1.79 | 2.17 <sup>cA</sup> ±1.31 | 3.24 <sup>aA</sup> ±1.23 |
|                              | 10                                                 | 4.65 <sup>cA</sup> ±0.76                  | 4.50 <sup>bA</sup> ±0.91 | 5.37 <sup>cA</sup> ±1.05 | 7.14 <sup>dB</sup> ±0.40 | 6.86 <sup>bB</sup> ±0.74 | 7.73 <sup>dC</sup> ±0.13 | n/p                      | n/p                      | n/p                      | n/p                      |

|                  |    |                              |                              |                              |                              |                              |                              |                          |                              |                              |                              |
|------------------|----|------------------------------|------------------------------|------------------------------|------------------------------|------------------------------|------------------------------|--------------------------|------------------------------|------------------------------|------------------------------|
|                  | 12 | n/p                          | n/p                          | n/p                          | n/p                          | n/p                          | n/p                          | 3.33 <sup>aA</sup> ±1.66 | 2.07 <sup>cA</sup> ±1.2<br>9 | 3.72 <sup>aA</sup> ±2.00     | 3.15 <sup>aA</sup> ±0.9<br>4 |
|                  | 14 | 4.12 <sup>cA</sup> ±0.4<br>7 | 5.12 <sup>dB</sup> ±0.36     | 6.02 <sup>±0.2</sup><br>7    | 6.76 <sup>dB</sup> ±0.2<br>7 | 7.53 <sup>dE</sup> ±0.3<br>7 | 7.98 <sup>dF</sup> ±0.1<br>5 | 2.58 <sup>cC</sup> ±1.50 | 1.55 <sup>bH</sup> ±0.7<br>7 | 3.34 <sup>cC</sup> ±0.00     | 3.22 <sup>cC</sup> ±0.2<br>5 |
|                  | 16 | n/p                          | n/p                          | n/p                          | n/p                          | n/p                          | n/p                          | 3.26 <sup>aA</sup> ±1.34 | 3.51 <sup>aA</sup> ±1.1<br>0 | 4.10 <sup>aA</sup> ±0.75     | 4.28 <sup>aA</sup> ±0.4<br>0 |
|                  | 17 | 5.30 <sup>dA</sup> ±0.8<br>4 | 5.97 <sup>dA</sup> ±0.5<br>4 | 6.90 <sup>bB</sup> ±0.24     | 7.50 <sup>dC</sup> ±0.5<br>4 | 8.03 <sup>dC</sup> ±0.2<br>4 | 7.88 <sup>dC</sup> ±0.3<br>2 | n/p                      | n/p                          | n/p                          | n/p                          |
|                  | 21 | 4.86 <sup>dA</sup> ±0.4<br>7 | 5.95 <sup>dB</sup> ±0.4<br>4 | 6.84 <sup>cC</sup> ±0.3<br>7 | 7.64 <sup>dB</sup> ±0.7<br>7 | 8.29 <sup>dE</sup> ±0.4<br>2 | 7.13 <sup>cC</sup> ±0.3<br>3 | 1.00 <sup>bF</sup> ±0.00 | 1.32 <sup>bF</sup> ±0.00     | 1.67 <sup>bF</sup> ±0.25     | 1.11 <sup>aF</sup> ±0.15     |
|                  | 24 | 5.04 <sup>dA</sup> ±0.3<br>8 | 5.23 <sup>cA</sup> ±0.3<br>5 | 6.16 <sup>dB</sup> ±0.4<br>2 | 6.73 <sup>dB</sup> ±0.7<br>2 | 8.70 <sup>cC</sup> ±0.0<br>9 | 6.76 <sup>cB</sup> ±0.41     | n/p                      | n/p                          | n/p                          | n/p                          |
|                  | 28 | 5.06 <sup>dA</sup> ±0.4<br>4 | 6.31 <sup>dB</sup> ±0.7<br>9 | 6.40 <sup>dB</sup> ±0.5<br>1 | 7.55 <sup>dC</sup> ±0.5<br>0 | 7.79 <sup>dC</sup> ±0.0<br>9 | 6.87 <sup>cB</sup> ±0.78     | n/p                      | n/p                          | n/p                          | n/p                          |
|                  | 35 | 5.43 <sup>dA</sup> ±0.4<br>8 | 6.73 <sup>dB</sup> ±0.6<br>8 | 5.86 <sup>aA</sup> ±0.2<br>0 | 6.04 <sup>dB</sup> ±0.69     | 7.31 <sup>dC</sup> ±0.2<br>9 | 6.55 <sup>cB</sup> ±0.35     | n/p                      | n/p                          | n/p                          | n/p                          |
| <i>S. aureus</i> | 0  | 2.44 <sup>aA</sup> ±0.3<br>9 | 1.12 <sup>aB</sup> ±0.79 | 1.12 <sup>aB</sup> ±0.79     | 1.12 <sup>aB</sup> ±0.79     | 1.12 <sup>aB</sup> ±0.79     |
|                  | 1  | 1.15 <sup>bA</sup> ±0.1<br>6 | 1.26 <sup>bA</sup> ±0.3<br>7 | 1.18 <sup>bA</sup> ±0.3<br>3 | 1.73 <sup>bA</sup> ±0.2<br>5 | 1.82 <sup>aA</sup> ±0.2<br>1 | 1.91 <sup>bB</sup> ±0.1<br>6 | n/p                      | n/p                          | n/p                          | n/p                          |
|                  | 3  | 1.23 <sup>bA</sup> ±0.2<br>2 | 1.52 <sup>bA</sup> ±0.3<br>9 | 3.47 <sup>cB</sup> ±0.29     | 1.59 <sup>bA</sup> ±0.4<br>7 | 3.84 <sup>±0.11</sup>        | 3.79 <sup>cB</sup> ±0.06     | 1.00 <sup>aA</sup> ±0.00 | 1.28 <sup>aA</sup> ±0.2<br>1 | 1.00 <sup>aA</sup> ±0.00     | 1.33 <sup>aA</sup> ±0.4<br>7 |
|                  | 7  | 1.93 <sup>cA</sup> ±0.2<br>8 | 2.32 <sup>aB</sup> ±0.22     | 2.37 <sup>aB</sup> ±0.22     | 1.77 <sup>bA</sup> ±0.3<br>3 | 0.00 <sup>dC</sup> ±0.0<br>0 | 2.41 <sup>aB</sup> ±0.78     | 1.30 <sup>aD</sup> ±0.25 | 1.00 <sup>aD</sup> ±0.0<br>0 | 1.22 <sup>aD</sup> ±0.31     | 1.44 <sup>aD</sup> ±0.6<br>2 |
|                  | 10 | 2.21 <sup>aA</sup> ±0.2<br>3 | 1.81 <sup>cA</sup> ±0.6<br>9 | 3.23 <sup>cB</sup> ±0.32     | 3.31 <sup>cB</sup> ±0.76     | 3.08 <sup>±0.28</sup>        | 3.51 <sup>cB</sup> ±0.33     | n/p                      | n/p                          | n/p                          | n/p                          |
|                  | 12 | n/p                          | n/p                          | n/p                          | n/p                          | n/p                          | n/p                          | 2.02 <sup>bA</sup> ±1.02 | 2.01 <sup>bA</sup> ±0.7<br>5 | 2.18 <sup>bA</sup> ±0.9<br>1 | 1.72 <sup>aA</sup> ±0.6<br>9 |
|                  | 14 | 1.97 <sup>aA</sup> ±0.3<br>3 | 1.82 <sup>cA</sup> ±0.1<br>4 | 2.17 <sup>aA</sup> ±0.4<br>1 | 1.96 <sup>bA</sup> ±0.2<br>4 | 2.16 <sup>aA</sup> ±0.1<br>8 | 1.92 <sup>bA</sup> ±0.6<br>9 | 2.19 <sup>bA</sup> ±0.61 | 1.17 <sup>aB</sup> ±0.24     | 1.00 <sup>bB</sup> ±0.00     | 1.00 <sup>bB</sup> ±0.00     |
|                  | 16 | n/p                          | n/p                          | n/p                          | n/p                          | n/p                          | n/p                          | 1.00 <sup>aA</sup> ±0.00 | 1.11 <sup>aA</sup> ±0.1<br>5 | 1.21 <sup>aA</sup> ±0.30     | 1.15 <sup>aA</sup> ±0.2<br>2 |
|                  | 17 | 0.96 <sup>bA</sup> ±0.1<br>5 | 1.82 <sup>dB</sup> ±0.14     | 2.37 <sup>cC</sup> ±0.3<br>4 | 1.83 <sup>bB</sup> ±0.2<br>1 | 4.06 <sup>dD</sup> ±0.3<br>4 | 3.17 <sup>dE</sup> ±0.1<br>6 | n/p                      | n/p                          | n/p                          | n/p                          |
|                  | 21 | 1.44 <sup>bA</sup> ±0.7<br>0 | 1.74 <sup>bA</sup> ±0.6<br>8 | 1.48 <sup>bA</sup> ±0.5<br>9 | 2.24 <sup>aB</sup> ±0.46     | 0.91 <sup>cC</sup> ±0.71     | 1.40 <sup>bA</sup> ±0.6<br>7 | 1.21 <sup>aA</sup> ±0.15 | 1.80 <sup>bA</sup> ±0.5<br>7 | 1.00 <sup>cC</sup> ±0.00     | 1.74 <sup>aA</sup> ±0.5<br>2 |
|                  | 24 | 1.84 <sup>aA</sup> ±0.4<br>6 | 1.65 <sup>bA</sup> ±0.6<br>7 | 1.56 <sup>bA</sup> ±0.5<br>8 | 1.59 <sup>bA</sup> ±0.5<br>3 | 1.49 <sup>bA</sup> ±0.6<br>6 | 1.76 <sup>bA</sup> ±0.5<br>3 | n/p                      | n/p                          | n/p                          | n/p                          |
|                  | 28 | 1.25 <sup>bA</sup> ±0.2<br>3 | 1.66 <sup>bB</sup> ±0.4<br>8 | 1.15 <sup>bA</sup> ±0.3<br>5 | 1.16 <sup>bA</sup> ±1.0<br>2 | 1.83 <sup>bB</sup> ±0.4<br>2 | 1.36 <sup>bA</sup> ±0.3<br>9 | n/p                      | n/p                          | n/p                          | n/p                          |
|                  | 35 | 1.79 <sup>aA</sup> ±0.5<br>6 | 1.45 <sup>bA</sup> ±0.6<br>0 | 0.92 <sup>bB</sup> ±0.0<br>2 | 1.36 <sup>bA</sup> ±0.9<br>7 | 1.94 <sup>bA</sup> ±0.2<br>4 | 1.18 <sup>bA</sup> ±0.2<br>8 | n/p                      | n/p                          | n/p                          | n/p                          |
| Yeast and mould  | 0  | 0.00 <sup>aA</sup> ±0.0<br>0 | 0.33 <sup>aB</sup> ±0.47 | 0.33 <sup>aB</sup> ±0.47     | 0.33 <sup>aB</sup> ±0.47     | 0.33 <sup>aB</sup> ±0.47     |
|                  | 1  | 0.00 <sup>aA</sup> ±0.0<br>0 | 0.00 <sup>aA</sup> ±0.0<br>0 | 0.00 <sup>aA</sup> ±0.0<br>0 | 2.52 <sup>±0.6</sup><br>3    | 0.58 <sup>bC</sup> ±0.8<br>2 | 0.00 <sup>aA</sup> ±0.0<br>0 | n/p                      | n/p                          | n/p                          | n/p                          |
|                  | 3  | 0.00 <sup>aA</sup> ±0.0<br>0 | 2.34 <sup>bB</sup> ±1.6<br>6 | 2.16 <sup>bB</sup> ±1.5<br>9 | 2.86 <sup>bB</sup> ±0.6<br>2 | 3.01 <sup>cB</sup> ±2.14     | 4.41 <sup>bC</sup> ±0.3<br>3 | 0.00 <sup>bA</sup> ±0.00 | 0.00 <sup>bA</sup> ±0.0<br>0 | 0.00 <sup>bA</sup> ±0.0<br>0 | 0.00 <sup>bA</sup> ±0.0<br>0 |
|                  | 7  | 0.00 <sup>aA</sup> ±0.0<br>0 | 0.74 <sup>dB</sup> ±0.53     | 1.17 <sup>dB</sup> ±0.24     | 0.88 <sup>aB</sup> ±0.68     | 2.99 <sup>cC</sup> ±1.3<br>9 | 2.32 <sup>cC</sup> ±0.7<br>8 | 0.00 <sup>bA</sup> ±0.00 | 0.00 <sup>bA</sup> ±0.0<br>0 | 0.00 <sup>bA</sup> ±0.0<br>0 | 0.00 <sup>bA</sup> ±0.0<br>0 |
|                  | 10 | 1.00 <sup>bA</sup> ±0.7<br>3 | 3.78 <sup>dB</sup> ±0.6<br>6 | 2.58 <sup>cC</sup> ±1.1<br>6 | 2.90 <sup>cC</sup> ±2.0<br>7 | 3.67 <sup>dB</sup> ±1.7<br>1 | 4.48 <sup>dB</sup> ±0.4<br>0 | n/p                      | n/p                          | n/p                          | n/p                          |
|                  | 12 | n/p                          | n/p                          | n/p                          | n/p                          | n/p                          | n/p                          | 0.00 <sup>bA</sup> ±0.00 | 0.00 <sup>bA</sup> ±0.0<br>0 | 1.55 <sup>cB</sup> ±1.28     | 0.00 <sup>bA</sup> ±0.0<br>0 |
|                  | 14 | 1.01 <sup>bA</sup> ±1.4<br>3 | 2.23 <sup>bB</sup> ±1.9<br>2 | 2.23 <sup>bB</sup> ±1.1<br>1 | 4.68 <sup>cC</sup> ±0.0<br>1 | 5.42 <sup>cD</sup> ±0.4<br>2 | 2.55 <sup>cB</sup> ±0.37     | 1.26 <sup>cA</sup> ±1.78 | 0.00 <sup>bE</sup> ±0.0<br>0 | 0.00 <sup>bE</sup> ±0.00     | 0.00 <sup>bE</sup> ±0.0<br>0 |
|                  | 16 | n/p                          | n/p                          | n/p                          | n/p                          | n/p                          | n/p                          | 0.00 <sup>bA</sup> ±0.00 | 0.00 <sup>bA</sup> ±0.0<br>0 | 1.22 <sup>cB</sup> ±1.73     | 0.00 <sup>bA</sup> ±0.0<br>0 |
|                  | 17 | 2.83 <sup>cA</sup> ±0.9<br>5 | 4.69 <sup>dB</sup> ±0.22     | 3.46 <sup>dC</sup> ±1.7<br>4 | 3.10 <sup>bA</sup> ±2.1<br>9 | 5.88 <sup>±0.15</sup>        | 6.03 <sup>dD</sup> ±0.3<br>1 | n/p                      | n/p                          | n/p                          | n/p                          |
|                  | 21 | 2.99 <sup>aA</sup> ±1.0<br>5 | 3.05 <sup>aA</sup> ±1.26     | 3.07 <sup>aA</sup> ±0.9<br>0 | 4.15 <sup>dB</sup> ±1.3<br>3 | 3.44 <sup>cC</sup> ±1.1<br>1 | 3.53 <sup>cC</sup> ±0.5<br>9 | 0.00 <sup>bD</sup> ±0.00 | 0.00 <sup>bD</sup> ±0.0<br>0 | 1.47 <sup>cE</sup> ±2.07     | 0.00 <sup>bD</sup> ±0.0<br>0 |
|                  | 24 | 3.69 <sup>bA</sup> ±1.1<br>3 | 4.72 <sup>dB</sup> ±0.13     | 3.90 <sup>aA</sup> ±1.3<br>5 | 3.27 <sup>bA</sup> ±2.3<br>2 | 5.86 <sup>cC</sup> ±0.15     | 4.48 <sup>bB</sup> ±0.5<br>8 | n/p                      | n/p                          | n/p                          | n/p                          |
|                  | 28 | 0.99 <sup>bA</sup> ±1.4<br>0 | 4.45 <sup>cB</sup> ±0.22     | 2.21 <sup>cC</sup> ±0.0<br>9 | 4.60 <sup>dB</sup> ±1.0<br>9 | 4.33 <sup>dB</sup> ±0.1<br>8 | 1.50 <sup>aA</sup> ±0.50     | n/p                      | n/p                          | n/p                          | n/p                          |
|                  | 35 | 2.39 <sup>cA</sup> ±1.6<br>9 | 3.37 <sup>dB</sup> ±1.4<br>4 | 2.84 <sup>cC</sup> ±1.5<br>1 | 3.23 <sup>dB</sup> ±1.0<br>3 | 2.49 <sup>aA</sup> ±0.4<br>1 | 1.00 <sup>±0.82</sup>        | n/p                      | n/p                          | n/p                          | n/p                          |

n/p – test was not performed on this measurement day

A, B, C, D, E, F, G, H – means in the same row marked with the same letters are not statistically different at  $\alpha = 0.05$

a, b, c, d, e, f - means in the same column marked with the same letters are not statistically different at  $\alpha = 0.05$

$p < 0.01$

**Table S3.** Mean values of pH and w<sub>a</sub> of RTE meat bars during storage (MAP\_C, VP\_C, MAP\_NC, VP\_NC)

| Temperature [°C] | Packaging technique | Factor         | Storage time [day] |       |       |       |       |       |       |       |       |
|------------------|---------------------|----------------|--------------------|-------|-------|-------|-------|-------|-------|-------|-------|
|                  |                     |                | 0                  | 3     | 7     | 12    | 14    | 16    | 21    | 28    | 35    |
| 4                | VP                  | pH             | 6.08               | 6.12  | 6.05  | 6.09  | 5.94  | 5.95  | 6.07  | n/p   | n/p   |
|                  |                     | W <sub>a</sub> | 0.945              | 0.947 | 0.948 | 0.951 | 0.944 | 0.946 | 0.947 | n/p   | n/p   |
|                  | MAP                 | pH             | 6.06               | n/p   | 6.09  | n/p   | 6.10  | n/p   | 6.10  | 6.08  | 6.13  |
|                  |                     | W <sub>a</sub> | 0.953              | n/p   | 0.942 | n/p   | 0.943 | n/p   | 0.952 | 0.952 | 0.947 |
| 6                | VP                  | pH             | 6.08               | 6.10  | 6.04  | 6.09  | 5.95  | 5.96  | 6.07  | n/p   | n/p   |
|                  |                     | W <sub>a</sub> | 0.945              | 0.945 | 0.948 | 0.945 | 0.943 | 0.948 | 0.943 | n/p   | n/p   |
| 8                | VP                  | pH             | 6.08               | 6.12  | 6.05  | 6.10  | 5.98  | 5.96  | 6.05  | n/p   | n/p   |
|                  |                     | W <sub>a</sub> | 0.945              | 0.946 | 0.949 | 0.944 | 0.945 | 0.947 | 0.944 | n/p   | n/p   |
|                  | MAP                 | pH             | 6.06               | n/p   | 6.09  | n/p   | 6.10  | n/p   | 6.10  | 6.09  | 6.12  |
|                  |                     | W <sub>a</sub> | 0.953              | n/p   | 0.951 | n/p   | 0.946 | n/p   | 0.947 | 0.948 | 0.947 |
| 12               | VP                  | pH             | 6.08               | 6.12  | 6.04  | 6.11  | 5.98  | 5.97  | 6.08  | n/p   | n/p   |
|                  |                     | W <sub>a</sub> | 0.945              | 0.943 | 0.950 | 0.946 | 0.940 | 0.946 | 0.942 | n/p   | n/p   |
|                  | MAP                 | pH             | 6.06               | n/p   | 6.10  | n/p   | 6.09  | n/p   | 6.09  | 6.08  | 6.11  |
|                  |                     | W <sub>a</sub> | 0.953              | n/p   | 0.947 | n/p   | 0.946 | n/p   | 0.947 | 0.948 | 0.945 |
| 16               | VP                  | pH             | 6.08               | 6.07  | 6.03  | 6.12  | 5.98  | 5.97  | 6.05  | n/p   | n/p   |
|                  |                     | W <sub>a</sub> | 0.945              | 0.942 | 0.949 | 0.944 | 0.941 | 0.948 | 0.945 | n/p   | n/p   |
|                  | MAP                 | pH             | 6.06               | n/p   | 6.10  | n/p   | 6.06  | n/p   | 6.09  | 6.06  | 6.09  |
|                  |                     | W <sub>a</sub> | 0.953              | n/p   | 0.948 | n/p   | 0.951 | n/p   | 0.948 | 0.949 | 0.946 |
| 20               | VP                  | pH             | 6.08               | 6.08  | 6.04  | 6.10  | 5.98  | 6.00  | 6.07  | n/p   | n/p   |
|                  |                     | W <sub>a</sub> | 0.945              | 0.940 | 0.945 | 0.944 | 0.939 | 0.946 | 0.947 | n/p   | n/p   |
|                  | MAP                 | pH             | 6.06               | n/p   | 6.09  | n/p   | 5.92  | n/p   | 5.78  | 5.68  | 6.03  |
|                  |                     | W <sub>a</sub> | 0.953              | n/p   | 0.947 | n/p   | 0.948 | n/p   | 0.947 | 0.948 | 0.946 |
| 24               | VP                  | pH             | 6.08               | 6.09  | 6.04  | 6.12  | 5.97  | 5.97  | 6.06  | n/p   | n/p   |
|                  |                     | W <sub>a</sub> | 0.945              | 0.943 | 0.949 | 0.951 | 0.946 | 0.943 | 0.943 | n/p   | n/p   |
|                  | MAP                 | pH             | 6.06               | n/p   | 6.07  | n/p   | 5.88  | n/p   | 5.67  | 5.51  | 5.98  |
|                  |                     | W <sub>a</sub> | 0.953              | n/p   | 0.946 | n/p   | 0.944 | n/p   | 0.942 | 0.939 | 0.939 |
| 30               | VP                  | pH             | 6.06               | n/p   | 6.05  | n/p   | 5.66  | n/p   | 5.71  | 5.37  | 5.38  |
|                  |                     | W <sub>a</sub> | 0.953              | n/p   | 0.947 | n/p   | 0.939 | n/p   | 0.936 | 0.923 | 0.916 |
| 34               | MAP                 | pH             | 6.06               | n/p   | 5.88  | n/p   | 5.48  | n/p   | 5.50  | 5.23  | 5.45  |
|                  |                     | W <sub>a</sub> | 0.953              | n/p   | 0.945 | n/p   | 0.924 | n/p   | 0.920 | 0.908 | 0.904 |

n/p – test was not performed on this measurement day
